# Supplementary material for: Bone Microarchitecture and Biomechanics of the Necrotic Femoral Head
Source: PubMed Central journal article supplement (PMC5645321; doi:10.1038/s41598-017-13643-2), 2017-10-17

## Title

Bone Microarchitecture and Biomechanics of the Necrotic Femoral Head

## Authors

Jian-xiong Ma<sup>a,b,c,\*</sup>, Wei-wei He<sup>a,b,c,\*</sup>, Jie Zhao<sup>a,b,c</sup>, Ming-jie Kuang<sup>a,b,c</sup>, Hao-hao Bai<sup>a,b,c</sup>, Lei Sun<sup>a,b</sup>, Bin Lu<sup>a,b</sup>, Ai-xian Tian<sup>a,b</sup>, Ying Wang<sup>a,b</sup>, Ben-chao Dong<sup>a,b</sup>, Yan Wang<sup>a,b</sup>, Xin-long Ma<sup>a,b,†</sup>

\*These authors contributed equally to this work.

†Correspondence to Xin-long Ma.

<sup>a</sup> Orthopaedics Institute, Tianjin Hospital, Tianjin 300050, People's Republic of China

<sup>b</sup> Tianjin Hospital, Tianjin University, Tianjin 300211, People's Republic of China

<sup>c</sup> Biomechanics Labs of Orthopaedics Institute, Tianjin Hospital, Tianjin 300050, People's Republic of China

| Name           | Email                                                             |
|----------------|-------------------------------------------------------------------|
| Jian-xiong Ma  | <a href="mailto:m biomechanics@126.com">mbiomechanics@126.com</a> |
| Wei-wei He     | <a href="mailto:2010021204@tmu.edu.cn">2010021204@tmu.edu.cn</a>  |
| Jie Zhao       | <a href="mailto:zhaoj_91@163.com">zhaoj_91@163.com</a>            |
| Hao-hao Bai    | <a href="mailto:songbai1990@163.com">songbai1990@163.com</a>      |
| Ming-jie Kuang | <a href="mailto:doctorkmj@tmu.edu.cn">doctorkmj@tmu.edu.cn</a>    |
| Lei Sun        | <a href="mailto:sunleigys@163.com">sunleigys@163.com</a>          |
| Bin Lu         | <a href="mailto:578794146@qq.com">578794146@qq.com</a>            |
| Ai-xian Tian   | <a href="mailto:tianax1986@126.com">tianax1986@126.com</a>        |
| Ying Wang      | <a href="mailto:337533607@qq.com">337533607@qq.com</a>            |
| Ben-chao Dong  | <a href="mailto:441763510@qq.com">441763510@qq.com</a>            |
| Yan Wang       | <a href="mailto:280403251@qq.com">280403251@qq.com</a>            |

Corresponding author: Xin-long Ma; Postal address: NO.155, Munan Road, Heping District, Tianjin 300050, China; E-mail: [maxinlong432@sina.com](mailto:maxinlong432@sina.com); Phone number: +86-15602179419

**Trabecular microfractures in necrotic zone**

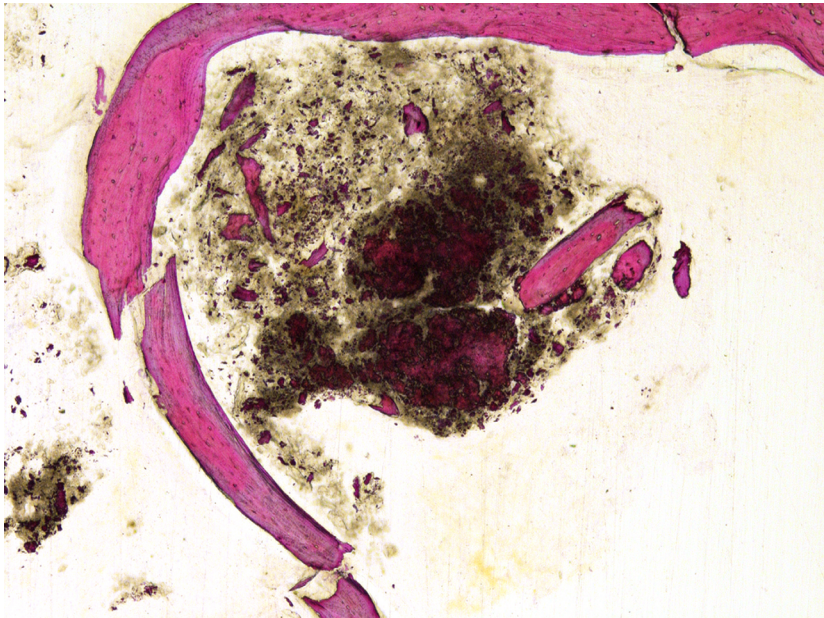

**Trabecular microfractures in sclerotic zone**

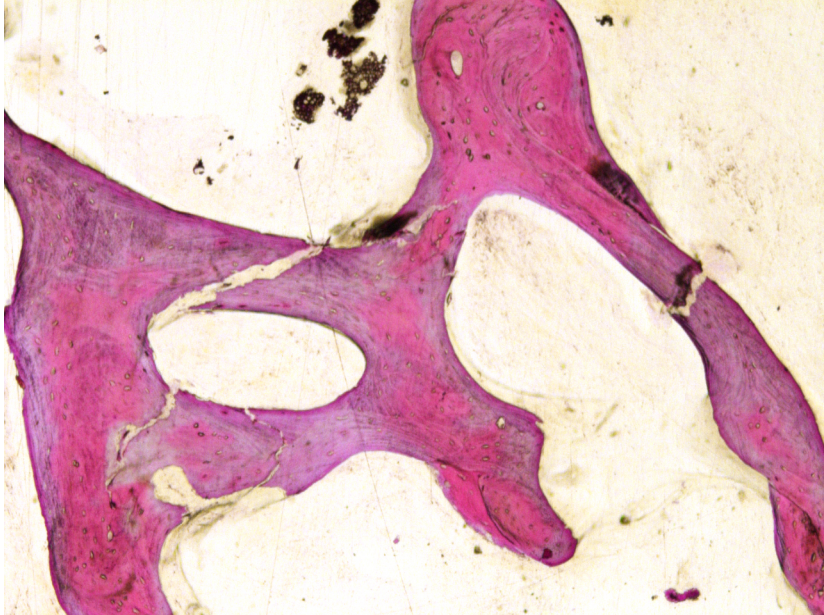

Supplement: 41598_2017_13643_MOESM1_ESM.pdf [file 41598_2017_13643_MOESM1_ESM.pdf]
